# Supplementary material for: Efficient Transformation of Somatic Embryos and Regeneration of Cork Oak Plantlets with a Gene (CsTL1) Encoding a Chestnut Thaumatin-Like Protein
Source: PubMed Central journal article supplement (PMC7916472; doi:10.3390/ijms22041757), 2021-02-10
Supplement: ijms-22-01757-s001.pdf [file ijms-22-01757-s001.pdf]

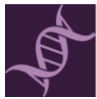

Article

# Efficient Transformation of Somatic Embryos and Regeneration of Cork Oak Plantlets with A Gene (*CsTL1*) Encoding a Chestnut Thaumatin-Like Protein

Vanesa Cano <sup>1</sup>, M<sup>a</sup> Teresa Martínez <sup>1</sup>, José Luis Couselo <sup>2,3</sup>, Elena Varas <sup>3</sup>, Francisco Javier Vieitez <sup>1</sup> and Elena Corredoira <sup>1,\*</sup>

<sup>1</sup> Instituto de Investigaciones Agrobiológicas de Galicia (IIAG), Avd Vigo s/n, 15705 Santiago de Compostela, Spain; vanesa.cano.lazaro@iiag.csic.es (V.C.); temar@iiag.csic.es (M<sup>a</sup>.T.M.); jvieitez@iiag.csic.es (F.J.V.)

<sup>2</sup> Universidad de Vigo, Edif. De Ciencias Experimentales, Bloque A, Campus Universitario, 36310 Vigo, Spain; jlcouselo@semillasfito.com (J.L.C.)

<sup>3</sup> Estación Fitopatológica do Areeiro (EFA), Subida a la Robleda s/n, 36153 Pontevedra, Spain; elenav@promiva.es (E.V.)

\* Correspondence: elenac@iiag.csic.es

## Supplementary material:

**Online Resource 1.** Cryopreservation of transgenic and non-transgenic (wt) cork oak lines.

**Online Resource 1A.** A. Embryo survival and embryo recovery rates in cryopreserved cork oak somatic embryos of transgenic and non-transgenic (wt) lines after preculture on sucrose medium, exposure to PVS2 solution for 60 min at 0°C and subsequent immersion in liquid nitrogen.

| EMBRYOGENIC LINE | SURVIVAL (%) | EMBRYO RECOVERY (%) |
|------------------|--------------|---------------------|
| <b>ALM6-wt</b>   | 63.3 ± 7.0   | 60.0 ± 5.8          |
| ALM6-tau 1       | 86.7 ± 1.9   | 80.0 ± 0.0          |
| ALM6-tau 6       | 96.7 ± 1.9   | 90.0 ± 0.0          |
| ALM6-tau 12      | 93.3 ± 1.9   | 86.7 ± 5.1          |
| <b>ALM80-wt</b>  | 90.0 ± 5.8   | 83.3 ± 3.9          |
| ALM80-tau 13     | 96.7 ± 1.9   | 76.7 ± 1.9          |
| ALM80-tau 19     | 96.7 ± 1.9   | 93.3 ± 1.9          |
| ALM80-tau 20     | 80.0 ± 0.0   | 76.7 ± 1.9          |
| <b>TGR3-wt</b>   | 66.7 ± 5.1   | 66.7 ± 5.1          |
| TGR3-tau 2       | 83.3 ± 4.7   | 80.0 ± 8.2          |
| TGR3-tau 4       | 63.3 ± 18.9  | 53.3 ± 12.5         |
| TGR3-tau 5       | 90.0 ± 3.4   | 90.0 ± 3.4          |
| TGR3-tau 6       | 100.0 ± 0.0  | 100.0 ± 0.0         |
| TGR3-tau 9       | 90.0 ± 8.2   | 80.0 ± 0.0          |
| TGR3-tau 18      | 100.0 ± 0.0  | 100.0 ± 0.0         |
| TGR3-tau 21      | 93.3 ± 1.9   | 93.3 ± 1.9          |
| TGR3-tau 23      | 93.3 ± 4.7   | 83.3 ± 4.7          |
| TGR3-tau 34      | 76.7 ± 17.0  | 66.7 ± 9.4          |
| TGR3-tau 36      | 90.0 ± 10.0  | 75.0 ± 25.0         |
| TGR3-tau 42      | 90.0 ± 14.1  | 86.7 ± 18.9         |
| TGR3-tau 45      | 96.7 ± 4.7   | 70.0 ± 8.2          |

Each value represents the mean ± standard error (SE) of 3 replicates (10 explants each).

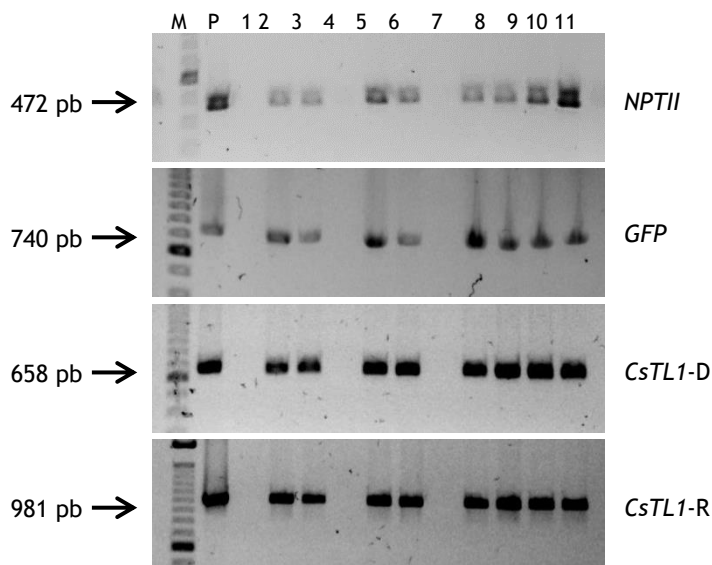

**Online Resource 1B.** PCR analysis of transgenic and non-transgenic (wt) lines after the cryopreservation process. M: molecular weight marker; P: plasmid (positive control); lanes 1-3: ALM6 non-transgenic (1) and transformed lines (2, 3); lanes 4-6: ALM80 non-transgenic (4) and transformed lines (5, 6); lanes 7-11: TGR3 non-transgenic (7) and transformed lines (8-11).

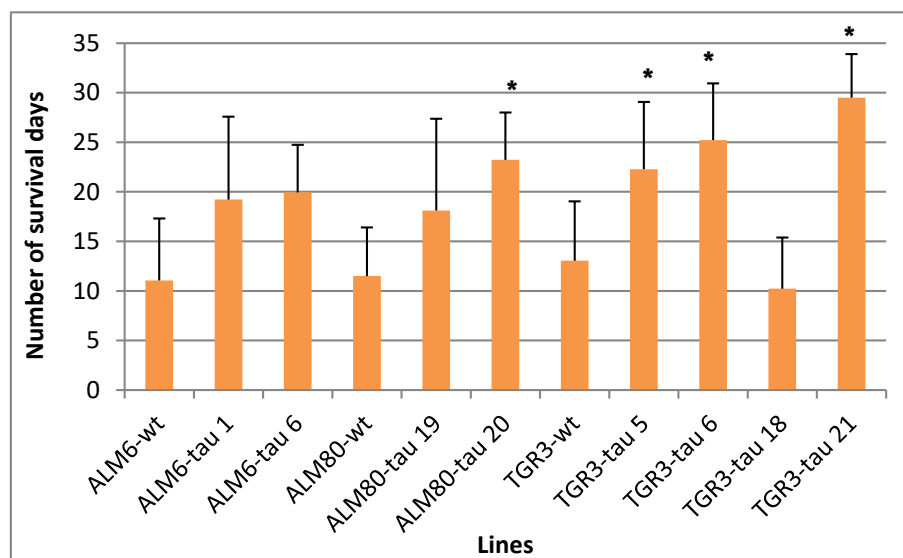

**Online Resource 2.** Number of days of survival of the transgenic and non-transgenic (wt) cork oak lines infected with *P. cinnamomi* and incubated for a period of 31 days. A total of 18 plants were evaluated for each line. Data analyzed by Kruskal-Wallis ( $p \leq 0.05$ ). The error bars represent the standard errors. Asterisks indicate statistical significance ( $p \leq 0.05$ ) of the lines with more days of survival.

**Online Resource 3.** Primers and PCR conditions used in the study.

| Gene         | Name    | Primer sequence (5'-3') | PCR conditions                                       | Fragment amplified (bp) | Purpose      |
|--------------|---------|-------------------------|------------------------------------------------------|-------------------------|--------------|
| <i>NPTII</i> | NPTII-F | GTCATCTCACCTTGCTCCTGCC  | 35 cycles:<br>94°C x 30s<br>60°C x 30s<br>72°C x 42s | 472                     | PCR analysis |
|              | NPTII-R | AAGAAGGCGATAGAAGCGA     |                                                      |                         |              |
| <i>EGFP</i>  | EGFP-F  | CACCGGGGTGGTGCCCAT      | 40 cycles:                                           | 740                     | PCR analysis |

|                                    |           |                         |                                                       |     |                                  |
|------------------------------------|-----------|-------------------------|-------------------------------------------------------|-----|----------------------------------|
|                                    | EGFP-R    | CTAGTGGATCCCCCGGGC      | 94°C x 15s<br>60°C x 30s<br>72°C x 1min               |     |                                  |
| <i>CsTL1</i> -Forward <sup>1</sup> | CsTL1-F-F | AGGTCACTGGATTTTGGT      | 40 cycles:<br>94°C x 15s<br>60°C x 30s<br>72°C x 1min | 981 | PCR analysis                     |
|                                    | CsTL1-F-R | CACCATGATGAAAACCCTG     |                                                       |     |                                  |
| <i>CsTL1</i> -Reverse <sup>2</sup> | CsTL1-R-F | GGTAAGGCCGTAGAGT        | 40 cycles:<br>94°C x 15s<br>60°C x 30s<br>72°C x 1min | 658 | PCR analysis                     |
|                                    | CsTL1-R-R | GATCTAACAGAACTCGCC      |                                                       |     |                                  |
| <i>CsTL1</i>                       | CsTL1-Fq  | GTTCAAGCTCCATGGAAAGG    | 40 cycles:<br>95°C x15s<br>60°C x 1min                | -   | qPCR analysis<br>of <i>CsTL1</i> |
|                                    | CsTL1-Rq  | ACCTGACCGGTGCTACAATC    |                                                       |     |                                  |
| <i>TUB</i>                         | QpTUBqF   | CTCGTGCTGTTCTCATGGATCT  | 40 cycles:<br>95°C x15s<br>60°C x 1min                | -   | Reference gene<br>for qPCR       |
|                                    | QpTUBqR   | TGGCCGAAAACGAAGTTGTC    |                                                       |     |                                  |
| <i>ACT</i>                         | QsACT-F   | GCCCCACGAGCTGTGTTC      | 40 cycles:<br>95°C x15s<br>60°C x 1min                | -   | Reference gene<br>for qPCR       |
|                                    | QsACT-R   | TCTGGCCCATTCCAACCA      |                                                       |     |                                  |
| <i>EF</i>                          | QsEF-F    | TTGTGCCGTCCTCATTATTGACT | 40 cycles:<br>95°C x15s<br>60°C x 1min                | -   | Reference gene<br>for qPCR       |
|                                    | QsEF-R    | TCACGGGTCTGACCATCCTT    |                                                       |     |                                  |

*CsTL1* gene was confirmed by PCR in both transcriptional senses using the specific primers *CsTL1*-Forward and *CsTL1*-Reverse. <sup>1</sup>This fragment includes T-35S region. <sup>2</sup>This fragment includes p35S region. F: forward; R: reverse; *TUB*: tubulin; *ACT*: actin; *EF*: elongation factor.
